# Supplementary material for: Nonlinear photoresponse of NaYF4:Yb,Er@NaYF4 nanocrystals under green CW excitation: a comprehensive study
Source: Royal Society of Chemistry journal article supplement (doi:10.1039/d0ra01380c), 2020-01-01
Supplement: d0ra01380c1.pdf [file d0ra01380c1.pdf]

## Nonlinear Photoresponse of NaYF<sub>4</sub>:Yb,Er@NaYF<sub>4</sub> Nanocrystals Under Green CW Excitation; A Comprehensive Study

Nahid Ghazyani<sup>a,b</sup>, Mohammad Hossein Majles Ara<sup>\*a,b</sup>, Mohammad Raoufi<sup>c,d</sup>

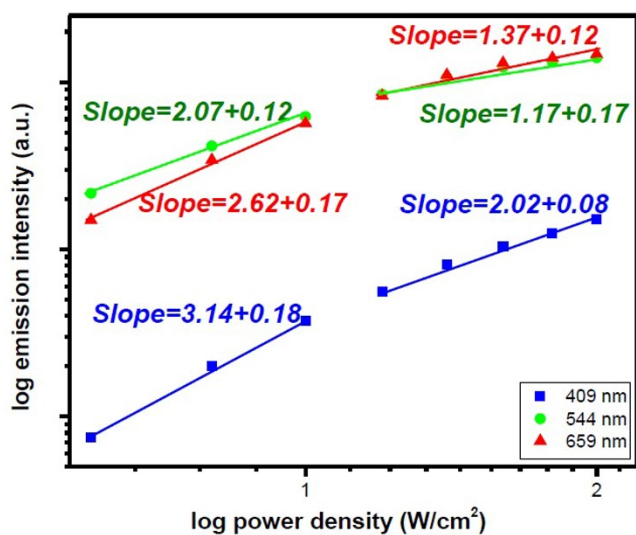

Figure S1) log-log plot of emission intensity of NaYF<sub>4</sub>:Yb,Er@ NaYF<sub>4</sub> versus excitation power density.
